# Supplementary material for: Single-cluster Au as an usher for deeply cyclable Li metal anodes
Source: Royal Society of Chemistry journal article supplement (doi:10.1039/c9ta02640a), 2019-01-01
Supplement: c9ta02640a1.pdf [file c9ta02640a1.pdf]

# Supporting Information

## Single-cluster Au as an Usher for Deeply Cyclable Li Metal Anode

Tingzhou Yang<sup>1, 2</sup>, Tao Qian<sup>1, \*</sup>, Xiaowei Shen<sup>1</sup>, Mengfan Wang<sup>1</sup>, Sisi Liu<sup>1</sup>, Jun Zhong<sup>3</sup>, Chenglin Yan<sup>1, \*</sup>, Federico Rosei<sup>2, \*</sup>

<sup>1</sup>College of Energy, Soochow University, Suzhou 215006, China.

<sup>2</sup>Institut National de la Recherche Scientifique, Centre Énergie, Matériaux et Télécommunications, 1650 Boulevard Lionel Boulet, J3X 1S2 Varennes, Québec, Canada.

<sup>3</sup>Institute of Functional Nano and Soft Materials (FUNSOM), Jiangsu Key Laboratory for Carbon-Based Functional Materials and Devices, Soochow University, Suzhou 215123, China.

\*Correspondence and requests for materials should be addressed to T.Q. (email: tqian@suda.edu.cn), F.R. (email: rosei@emt.inrs.ca) or to C.L.Y. (email: c.yan@suda.edu.cn).

Table S1. Summary of the reported literature on different types of Au or Ag modified current collector.<sup>S1-S5</sup>

| Current collector                             | CE at 0.5 mA cm <sup>-2</sup> | CE at 1.0 mA cm <sup>-2</sup> | CE at 5.0 mA cm <sup>-2</sup> | maximal life time | maximal deeply cyclable capacity |
|-----------------------------------------------|-------------------------------|-------------------------------|-------------------------------|-------------------|----------------------------------|
| Carbon spheres with Au nanoparticles          | 93%                           | -                             | -                             | 300 cycles        | 2.0 mAh cm <sup>-2</sup>         |
| Au modified carbon fiber matrix               | -                             | 99.2%                         | 98%                           | 400 cycles        | 5.0 mAh cm <sup>-2</sup>         |
| Au nanoparticles pillared RGO                 | 98.70%                        | ~98%                          | -                             | 200 cycles        | 5.0 mAh cm <sup>-2</sup>         |
| Ag coated carbon fiber framework              | -                             | -                             | -                             | 200 cycles        | 10.0 mAh cm <sup>-2</sup>        |
| Ag nanoparticles anchored on carbon nanofiber | 98%                           | -                             | -                             | 200 cycles        | 2.0 mAg cm <sup>-2</sup>         |
| Our strategy                                  | 99.82%                        | 99.6%                         | 99.17%                        | 900 cycles        | 20.0 mAh cm <sup>-2</sup>        |

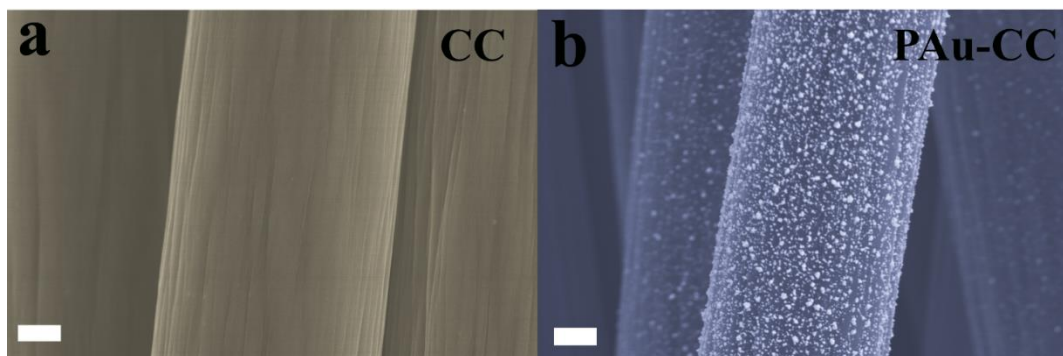

**Figure S1.** (a) SEM image of CC. (b) SEM image of PAu-CC, which shows the Au nanoparticle dispersed on the surface of CC. Scale bar, 10  $\mu\text{m}$ .

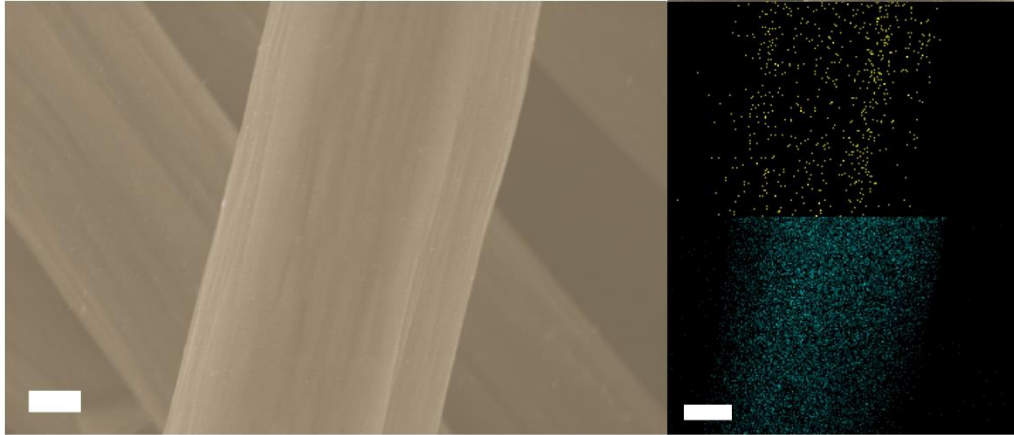

**Figure S2.** SEM images of SCAu-CC. Examination of the corresponding EDS mapping of Au and C reveals the homogeneous distribution of single-cluster Au on the carbon skeleton. Scale bar, 10  $\mu\text{m}$ .

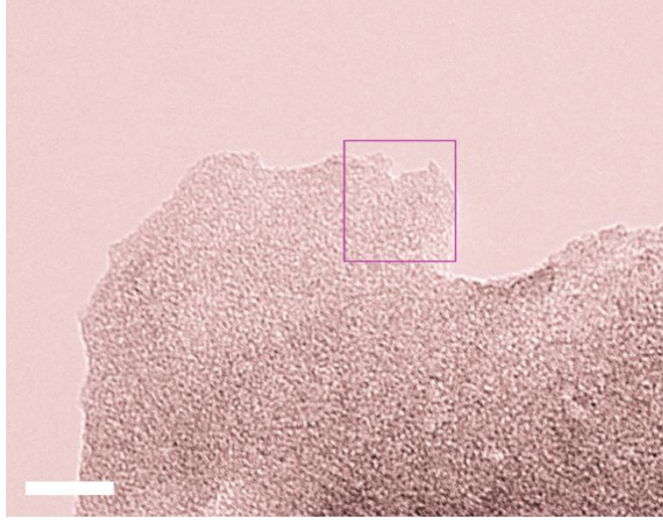

**Figure S3.** TEM image of SCAu-CC, and the selection of EELS mapping. Scale bar, 20nm.

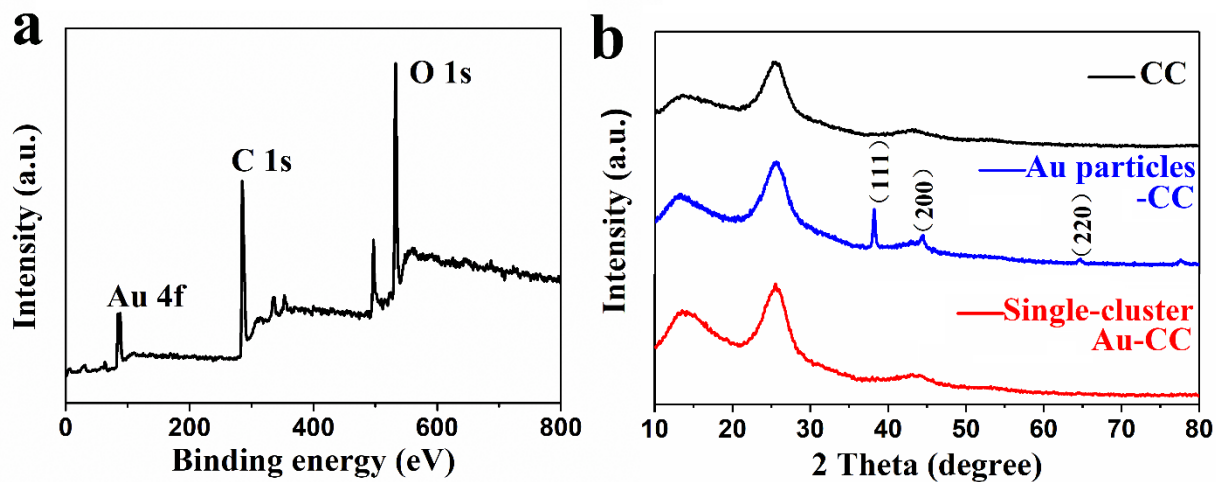

**Figure S4.** (a) X-ray photoelectron spectroscopy spectrum of SCAu-CC. (b) Comparison of X-ray diffraction patterns of CC, Pau-CC and SCAu-CC.

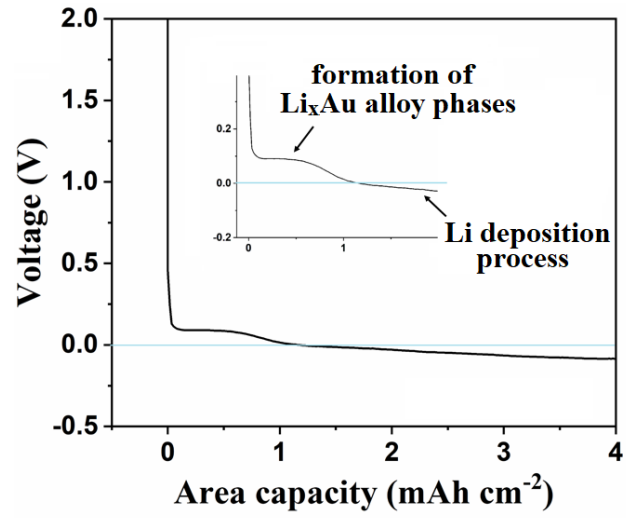

**Figure S5.** Voltage profiles of galvanostatic Li deposition on the SCAu-CC, which shows unique nucleation mechanism during first Li plating process.

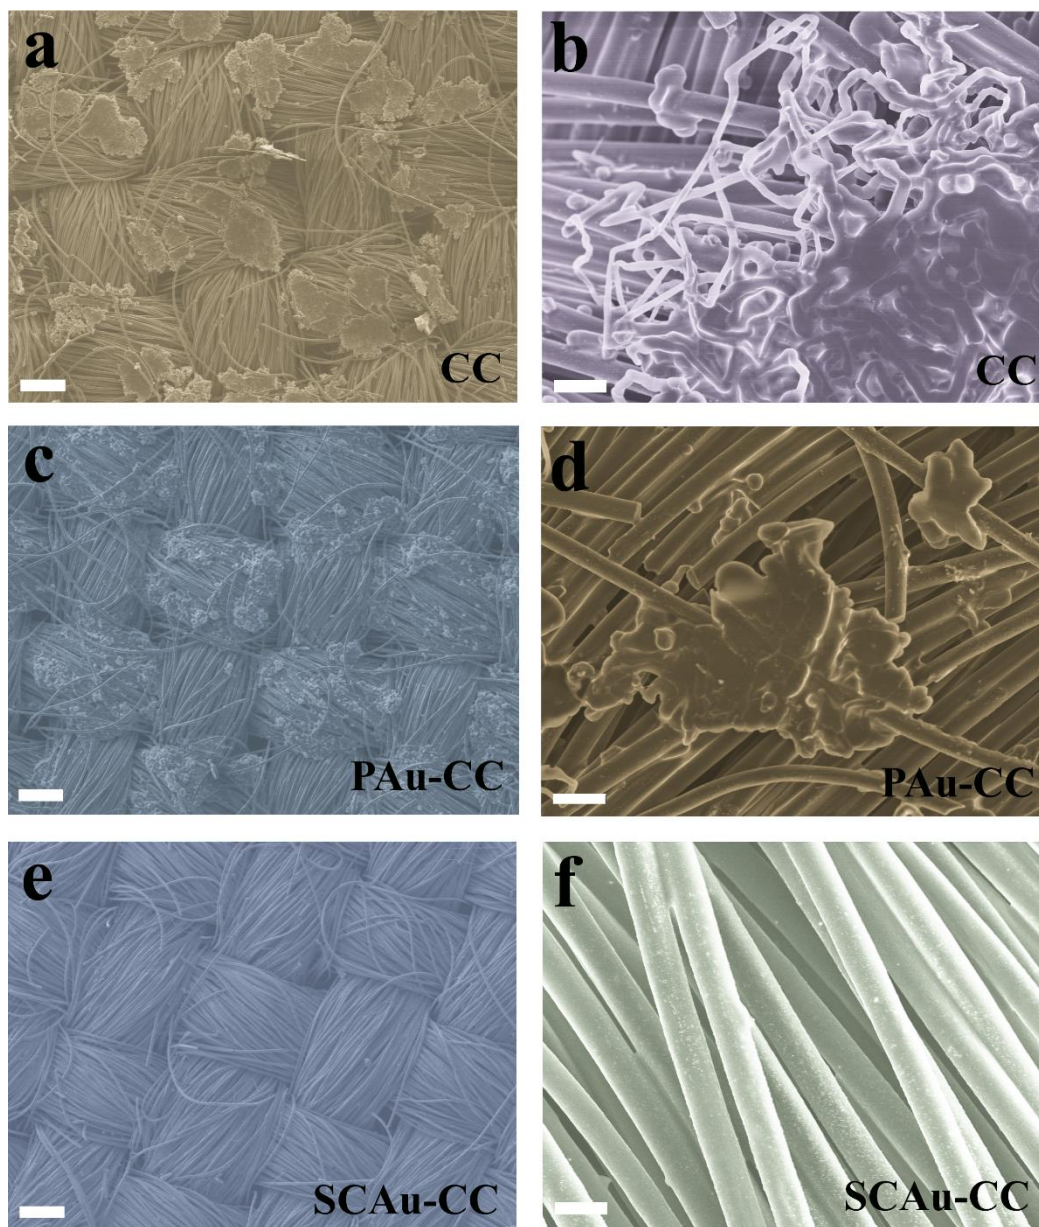

**Figure S6.** Morphology characterization by SEM images of (a,b) CC, (c,d) PAu-CC and (e,f) SCAu-CC after after plating  $6.0 \text{ mAh cm}^{-2}$  of Li metal. Scale bar,  $500 \mu\text{m}$  and  $50 \mu\text{m}$ .



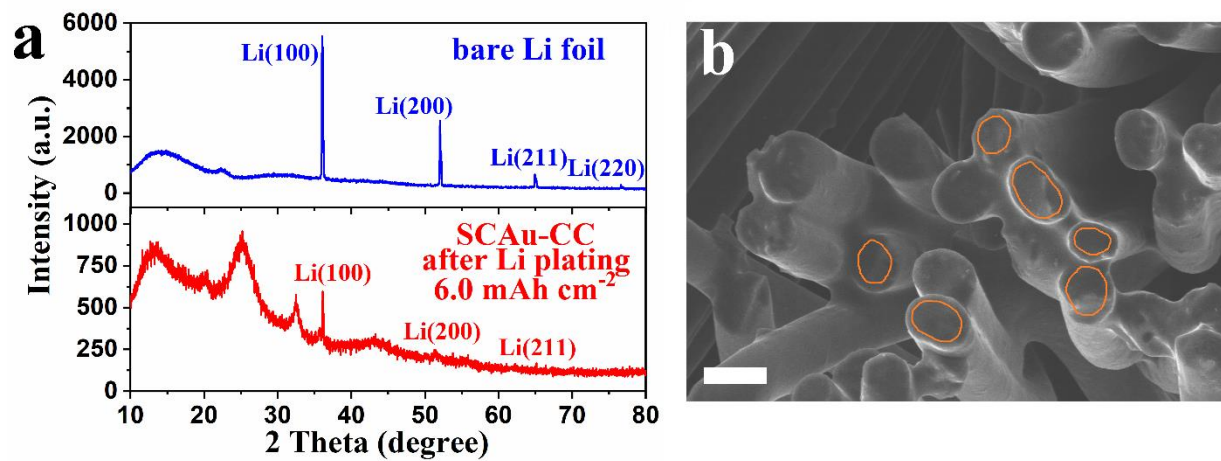

**Figure S7.** (a) Comparison of XRD patterns of bare Li foil and Li-SCAu-CC. Both of them exhibit the peaks centered at 36° (100), 52° (200) and 65° (211), demonstrating the successful Li plating on SCAu-CC. (b) The cross-section SEM view of the Li-SCAu-CC (6.0 mAh cm<sup>-2</sup>).

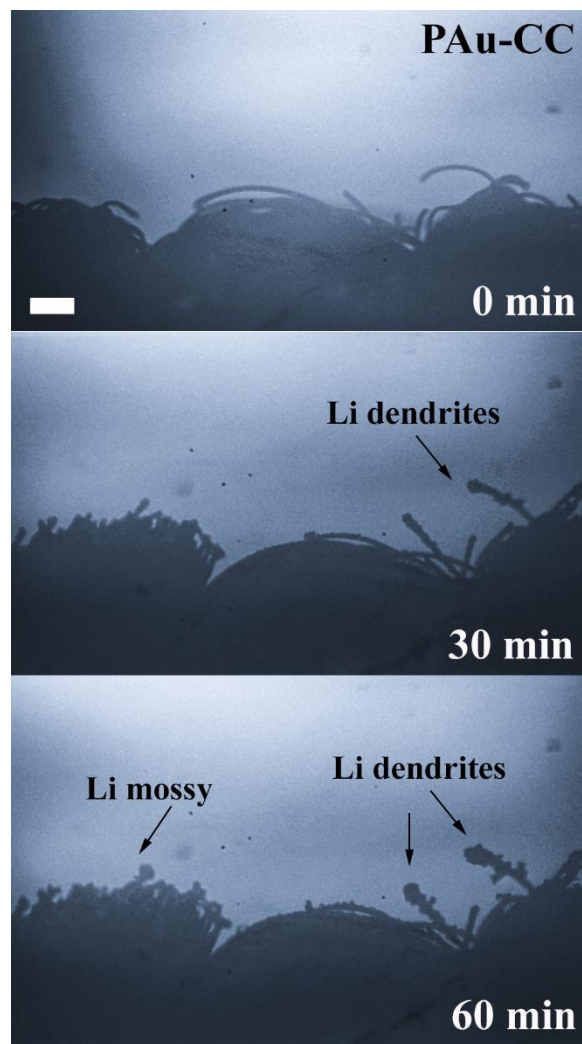

**Figure S8.** In situ optical microscopy observations of Li deposition process in PAu-CC.

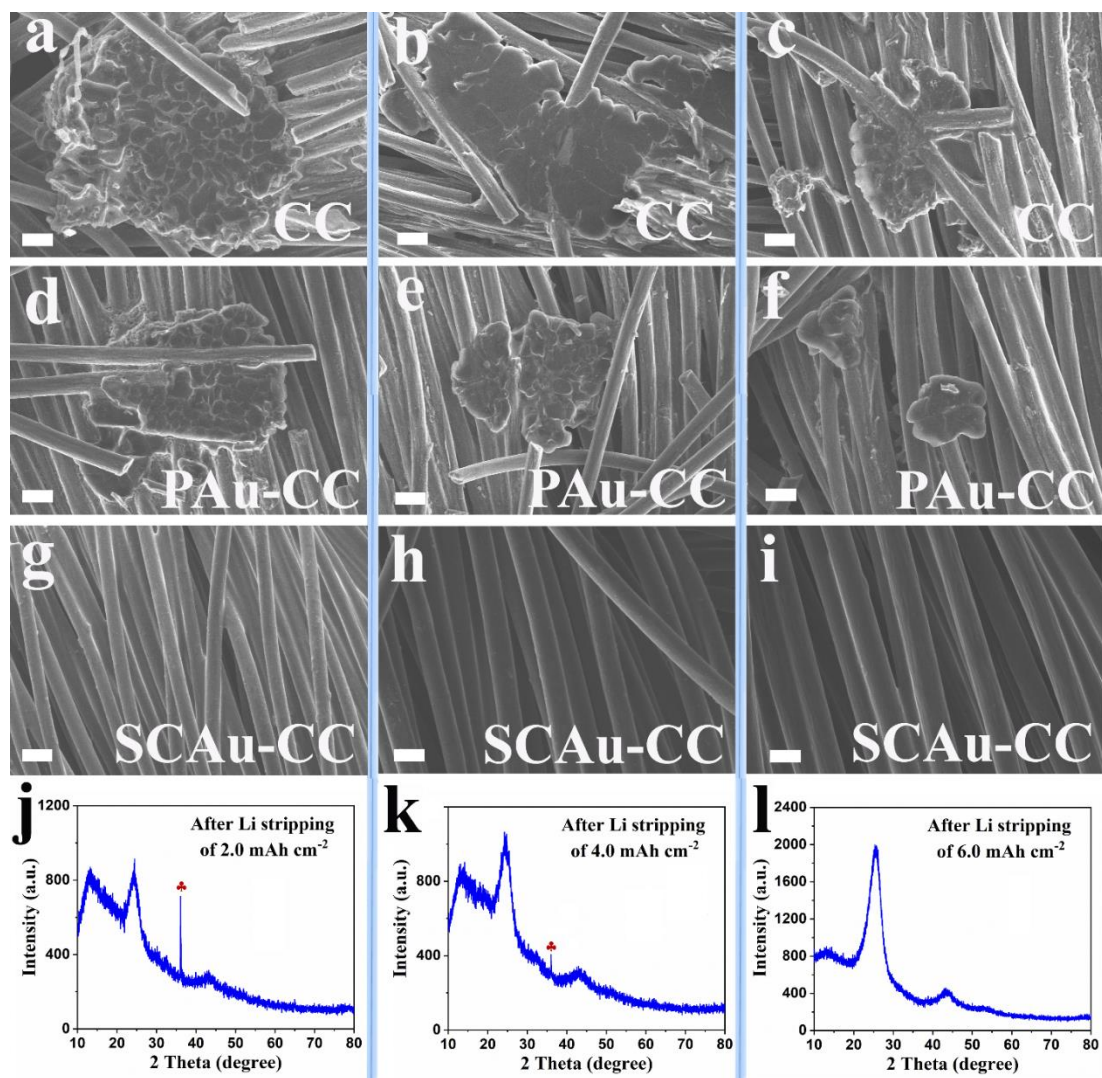

**Figure S9.** The SEM analysis of CC electrodes after (a) 2.0, (c) 4.0, and (e) 6.0 mAh cm<sup>-2</sup> of Li stripping. The morphologies of PAu-CC electrodes after (b) 2.0, (e) 4.0, and (f) 6.0 mAh cm<sup>-2</sup> of Li stripping. The morphologies and corresponding XRD patterns of Li-SCAu-CC (6.0 mAh cm<sup>-2</sup>) electrodes after (g, j) 2.0, (h, k) 4.0, and (i, l) 6.0 mAh cm<sup>-2</sup> of Li stripping.

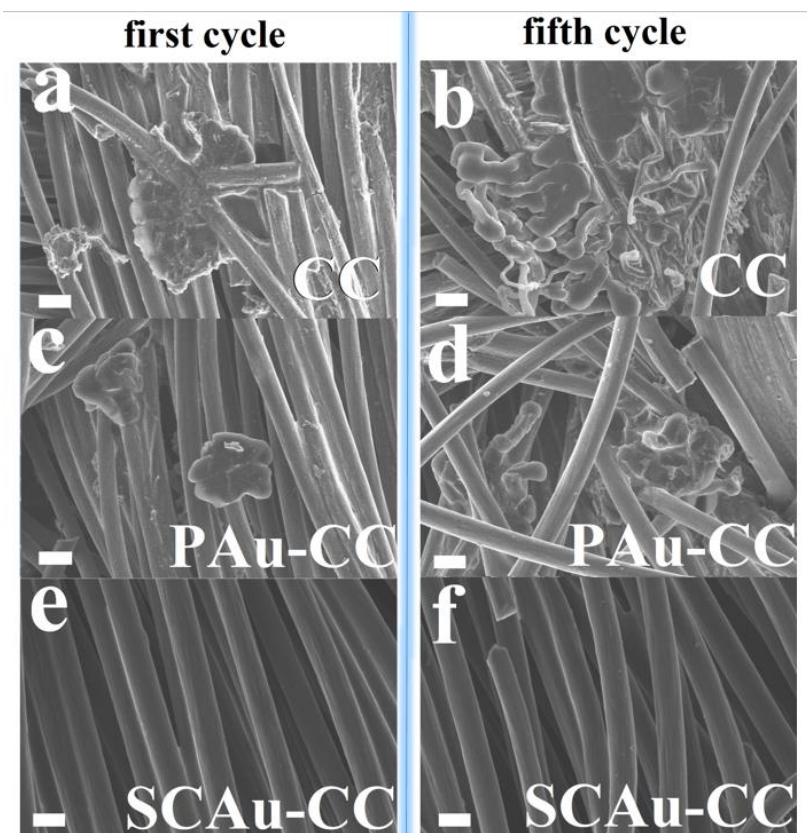

**Figure S10.** Characterization of Li metal anodes after Li stripping process at a current density of  $1.0 \text{ mAh cm}^{-2}$  with an area capacity of  $6.0 \text{ mAh cm}^{-2}$ . SEM images of (a) CC, (b) PAu-CC, and (c) SCAu-CC electrodes for the first cycle. SEM images of (d) CC, (e) PAu-CC, and (f) SCAu-CC electrodes after fifth Li stripping process. Scale bars:  $10 \mu\text{m}$ .

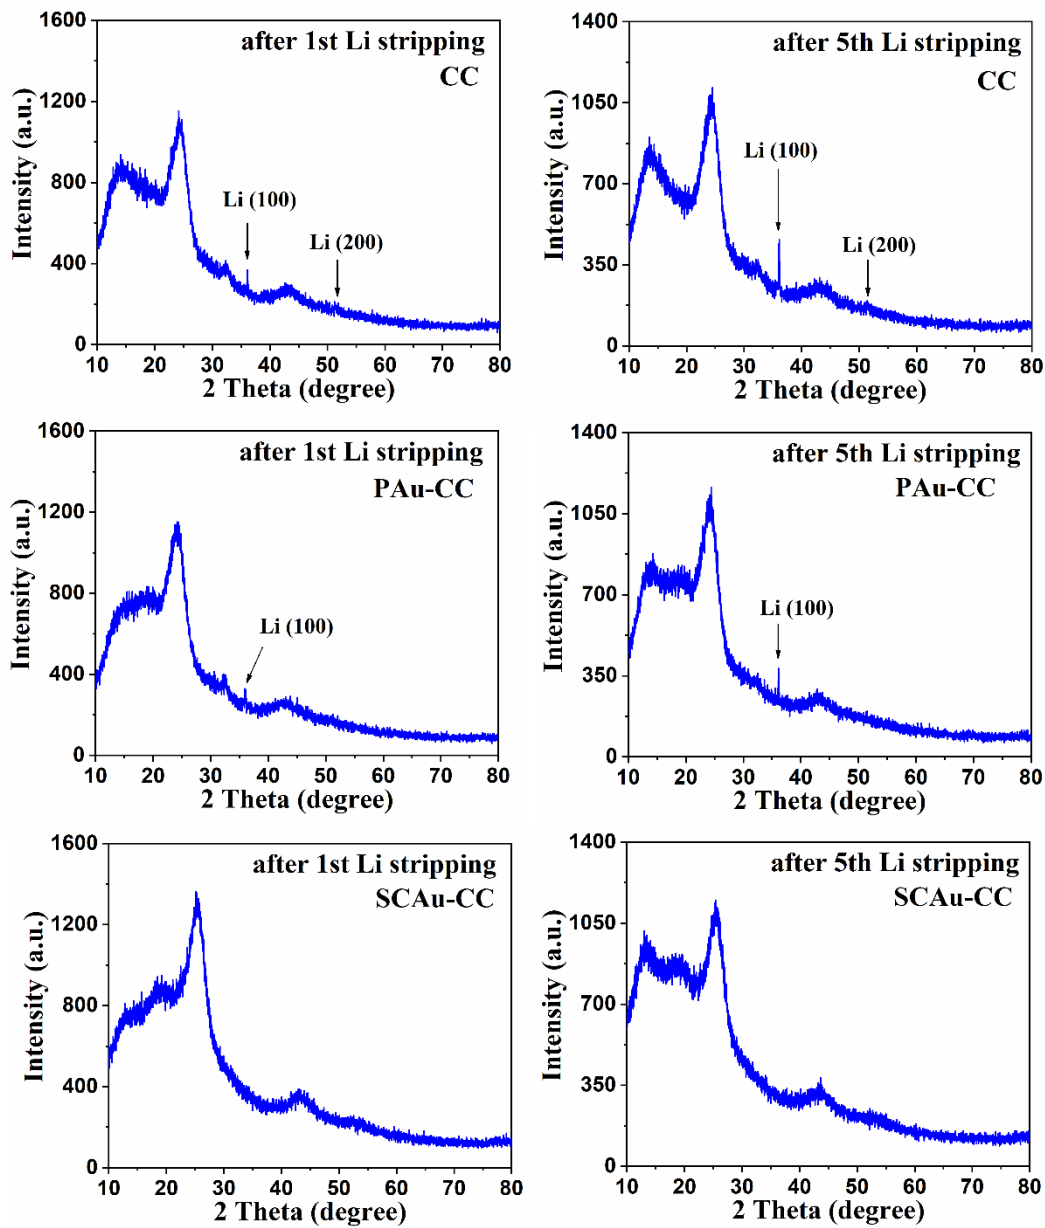

**Figure S11.** Comparison of XRD patterns of (a,b) CC, (c,d) PAu-CC and (e,f) SCAu-CC after the first cycle and the fifth cycle of Li stripping process.

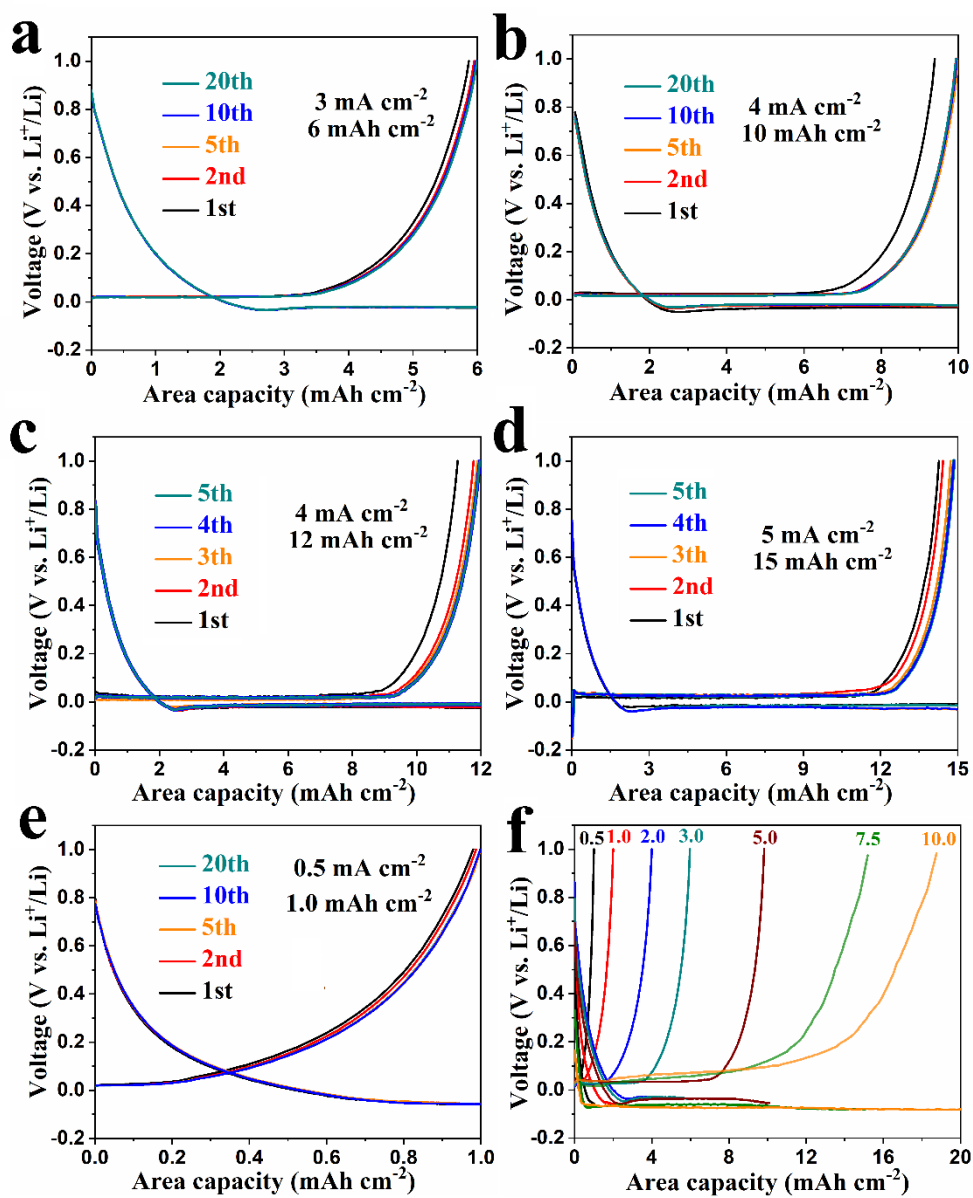

**Figure S12.** Voltage profiles of different Li plating/stripping process for SCAu-CC at different current density with an area capacity of (a)  $6.0 \text{ mAh cm}^{-2}$ , (b)  $10.0 \text{ mAh cm}^{-2}$ , (c)  $12.0 \text{ mAh cm}^{-2}$ , (d)  $15.0 \text{ mAh cm}^{-2}$ , and (e)  $1.0 \text{ mAh cm}^{-2}$ . (f) Voltage profiles of Li plating/stripping process at different current densities ( $0.5, 1.0, 2.0, 5.0, 7.5, 10.0 \text{ mA cm}^{-2}$ ).

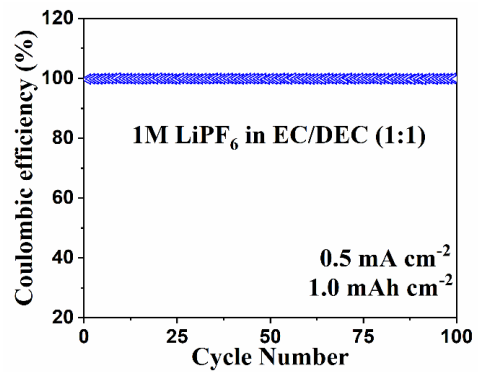

**Figure S13.** Electrochemical characterization of the SCAu-CC electrode with for Li plating and stripping process by the using of carbonate-based electrolyte.

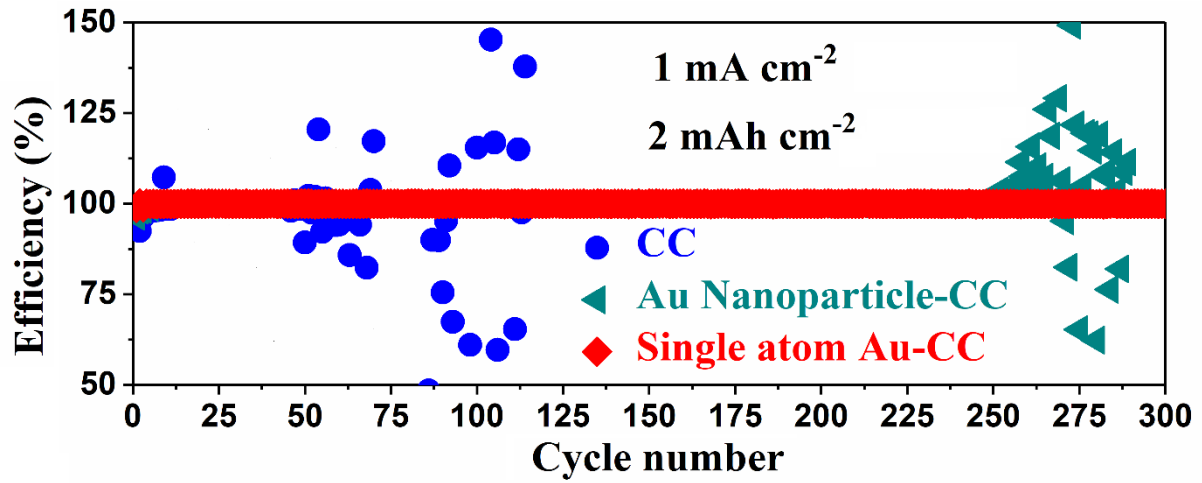

**Figure S14.** Comparison of CE of Li plating/stripping between CC, PAu-CC and SCAu-CC with areal capacity of 1.0 mAcm<sup>-2</sup> at a current density of 2.0 mA cm<sup>-2</sup>.



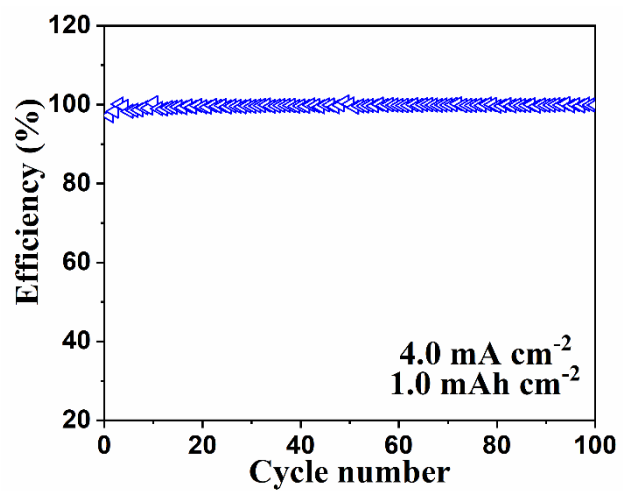

**Figure S15.** Coulombic efficiency of SCAu-CC at a high current density of  $4.0 \text{ mA cm}^{-2}$  and a low capacity of  $1.0 \text{ mAh cm}^{-2}$

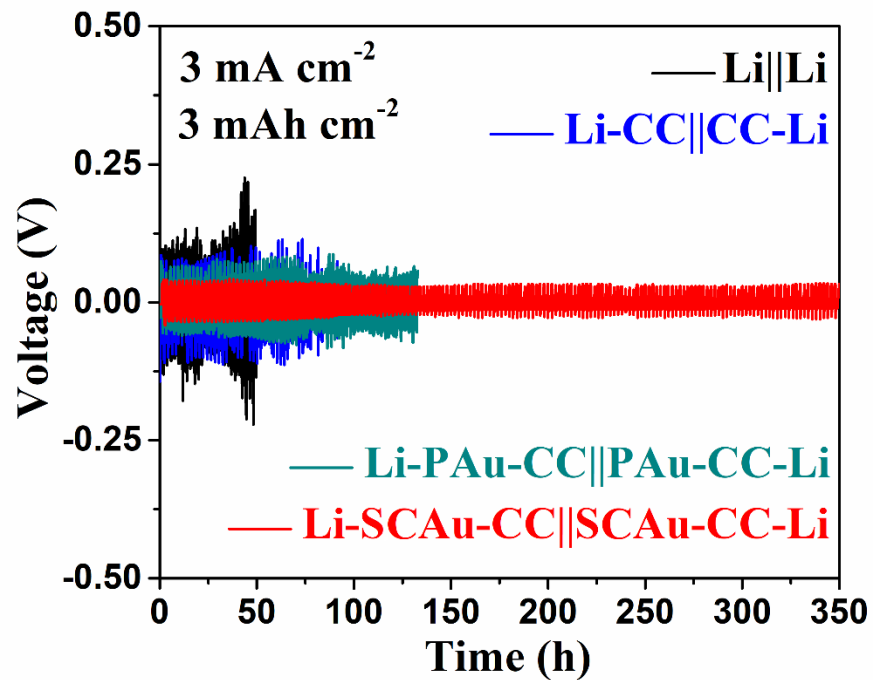

**Figure S16.** Galvanostatic Li plating/stripping profiles of symmetric cells with different anode with areal capacity of  $3.0 \text{ mAh cm}^{-2}$  at a current density of  $3.0 \text{ mA cm}^{-2}$ .

## References:

- S1 K. Yan, Z. Lu, H.-W. Lee, F. Xiong, P.-C. Hsu, Y. Li, J. Zhao, S. Chu and Y. Cui, *Nat Energy*, 2016, **1**, 359.
- S2 J. Xiang, L. Yuan, Y. Shen, Z. Cheng, K. Yuan, Z. Guo, Y. Zhang, X. Chen and Y. Huang, *Adv. Energy Mater.*, 2018, **8**, 1802352.
- S3 C. Yang, Y. Yao, S. He, H. Xie, E. Hitz and L. Hu, *Adv. Mater.*, 2017, **29**, 1702714.
- S4 R. Zhang, X. Chen, X. Shen, X.-Q. Zhang, X.-R. Chen, X.-B. Cheng, C. Yan, C.-Z. Zhao and Q. Zhang, *Joule*, 2018, **2**, 764-777.
- S5 J. Pu, J. Li, Z. Shen, C. Zhong, J. Liu, H. Ma, J. Zhu, H. Zhang and P. V. Braun, *Adv. Funct. Mater.*, 2018, **28**, 1804133.
